# Supplementary material for: Distinctive gut microbiomes of ankylosing spondylitis and inflammatory bowel disease patients suggest differing roles in pathogenesis and correlate with disease activity
Source: Springer Nature journal article supplement (doi:10.1186/s13075-022-02853-3), 2022-07-07

# BASDAI

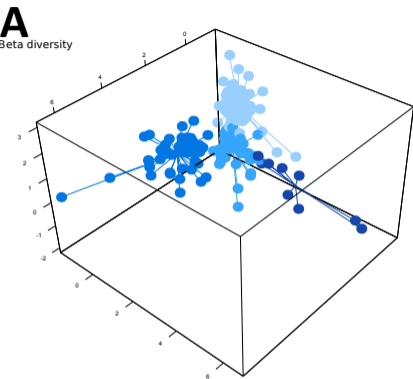

**B**  
Beta diversity (PERMANOVA)

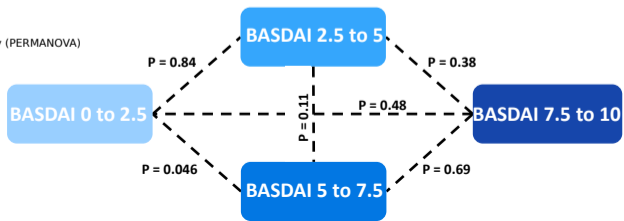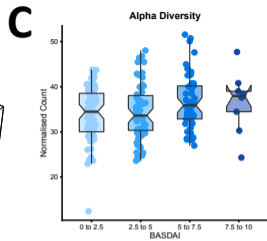

# FCP

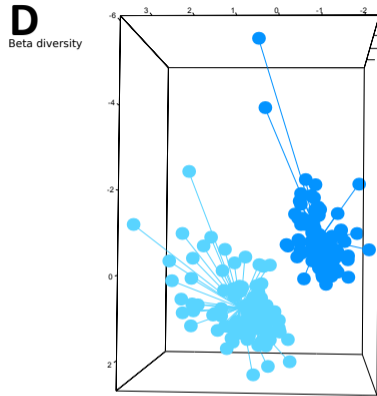

**E**  
Beta diversity (PERMANOVA)

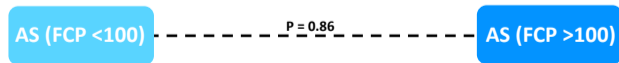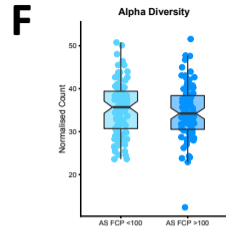

Supplement: MOESM1 [file 23248280]
